# Supplementary material for: Acquired resistance to combination treatment through loss of synergy with MEK and PI3K inhibitors in colorectal cancer
Source: PubMed Central journal article supplement (PMC5045388; doi:10.18632/oncotarget.8692), 2016-04-11
Supplement: oncotarget-07-29187-s001.pdf [file oncotarget-07-29187-s001.pdf]

# Acquired resistance to combination treatment through loss of synergy with MEK and PI3K inhibitors in colorectal cancer

## Supplementary Materials

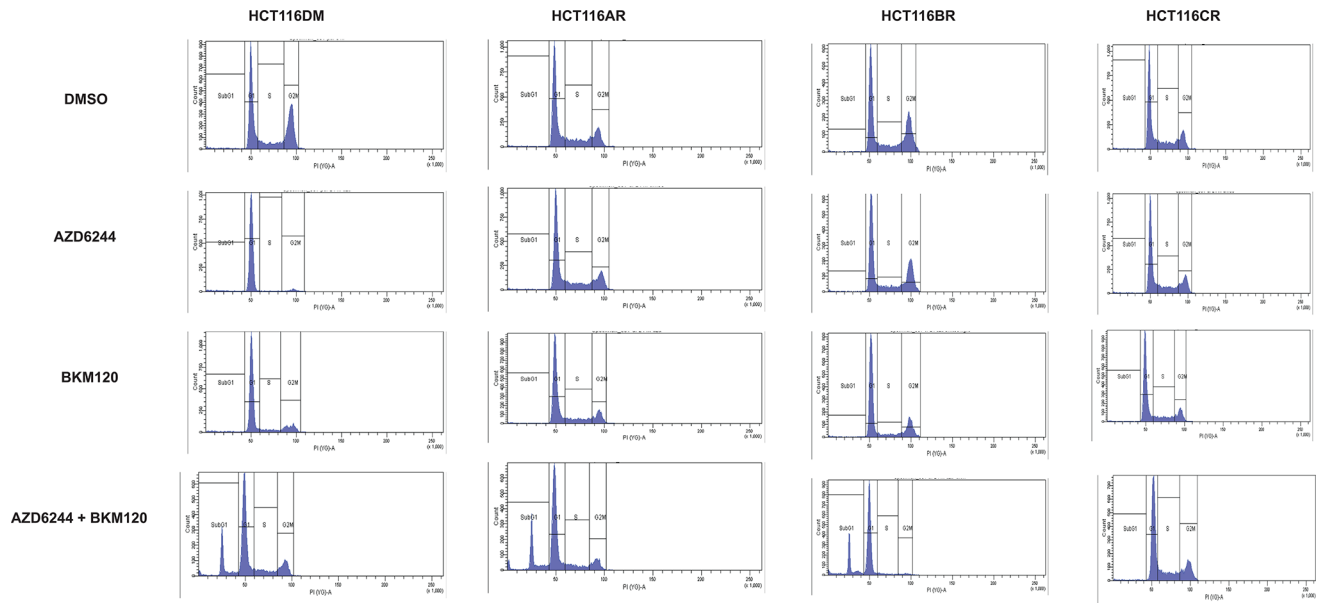

Supplementary Figure S1: Histograms showing cell cycle profiles of HCT16DM, HCT116AR, HCT116BR and HCT116CR cells exposed to DMSO,  $IC_{50}$  concentrations of AZD6244 or BKM120 and combination of AZD6244 and BKM120 ( $IC_{50} + IC_{50}$ ).

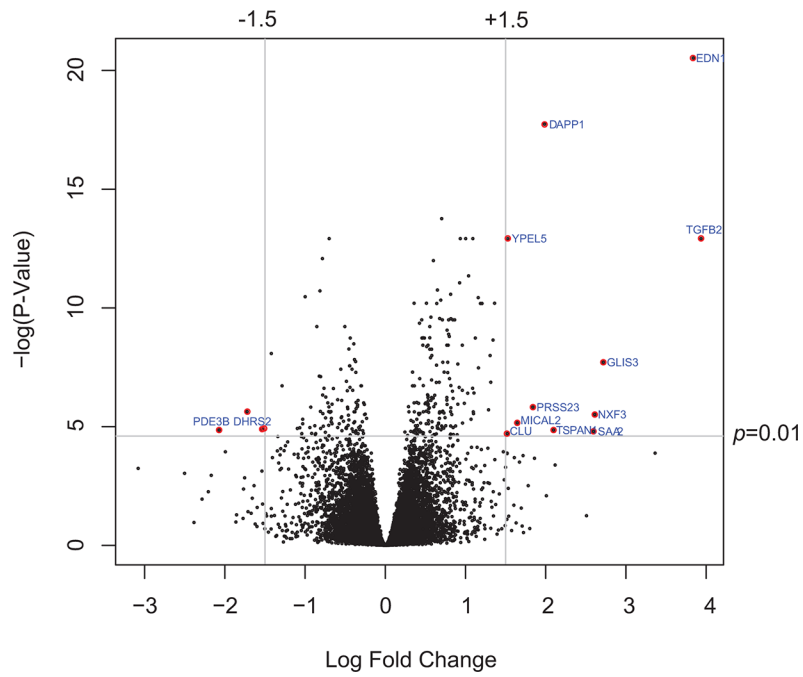

**Supplementary Figure S2: Volcano plot of genes according to their fold change in expression and *p*-value of differences between CR and DM cells of HCT116 and LoVo in gene expression array analysis.** Guides (dashed lines) for fold differences of 1.5 and *p*-values of 0.01 are indicated on the chart.

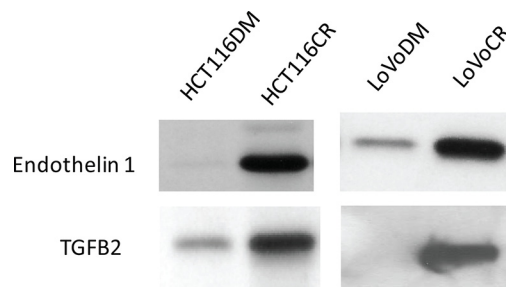

**Supplementary Figure S3: Protein levels of endothelin 1 and TGFB2 in HCT116DM, HCT116CR, LoVODM and LoVoCR cells.** A Representative immunoblot of three independent experiments is displayed.

■ HCT116DM  
 ▣ HCT116AR  
 ▤ HCT116BR  
 □ HCT116CR

■ LoVoDM  
 ▣ LoVoAR  
 ▤ LoVoBR  
 □ LoVoCR

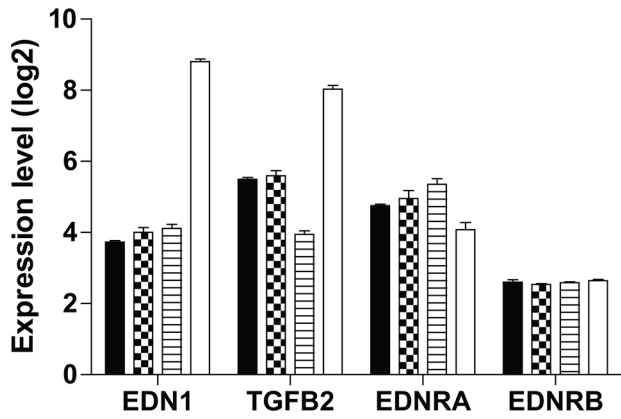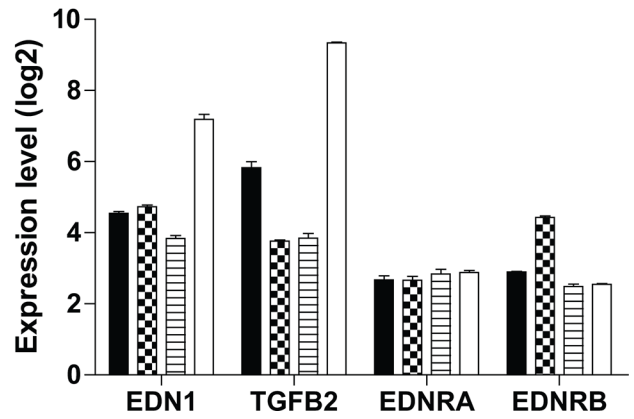

Supplementary Figure S4: Bar charts showing mRNA expression of EDN1, TGFB2, EDNRA and EDNRB in all three replicates of HCT116 or LoVo-derived DM, AR, BR and CR cells. Data are expressed as mean  $\pm$  std. deviation.

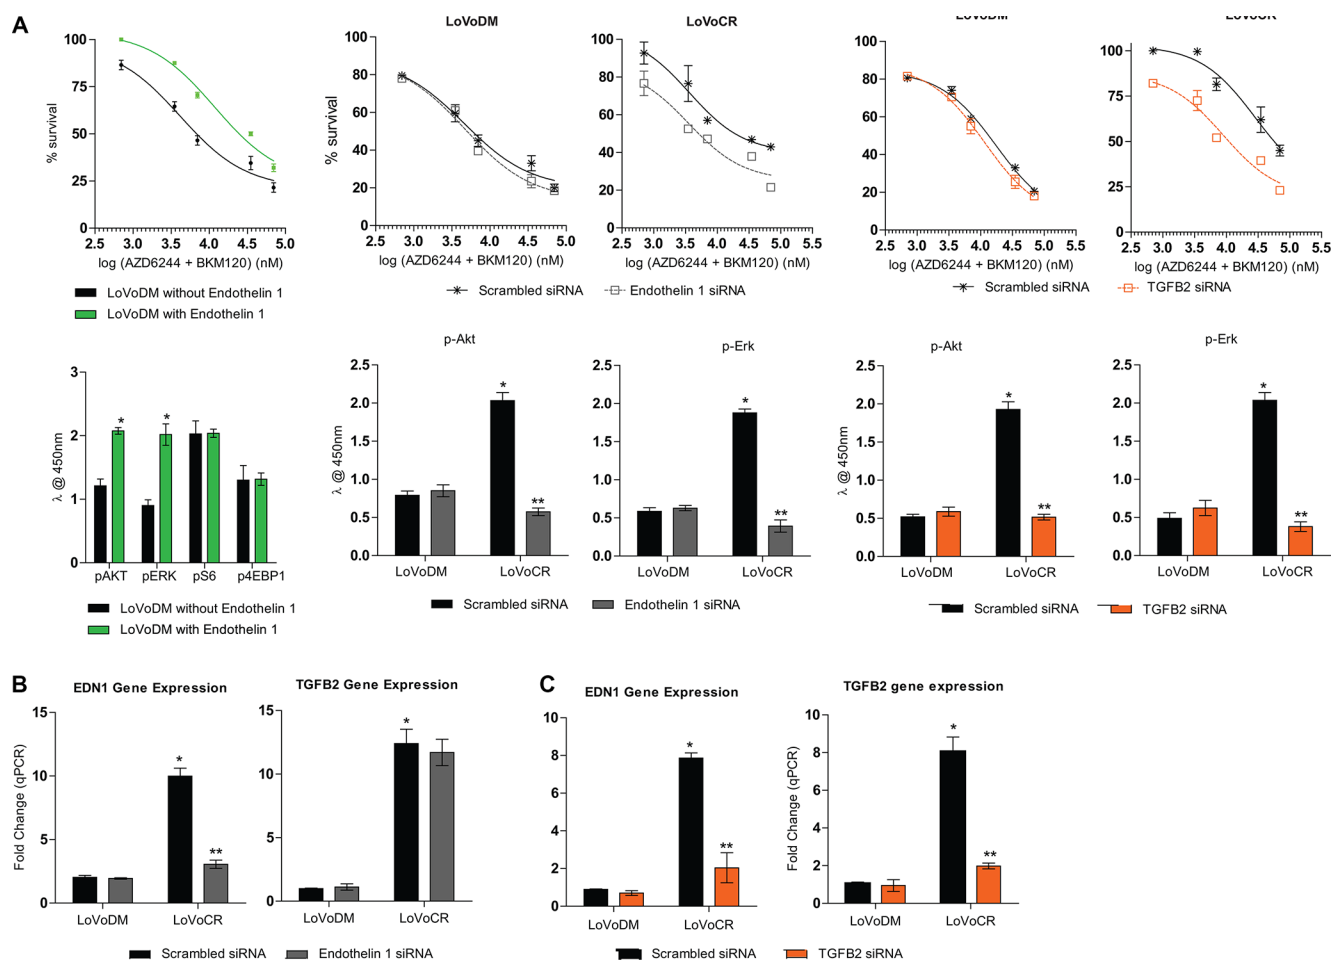

**Supplementary Figure S5: Effect of modulation of *EDN1* and *TGFB2* in LoVoDM and LoVoCR cells.** (A) Concentration response curves (top panel) and pathway signaling (bottom panel) of LoVoDM cells with or without extracellular supplementation of 100 nM endothelin-1 and treated with the combination of AZD6244 and BKM120. (B) *EDN1* and *TGFB2* mRNA levels (top panel), Dose response curves of treatment with the combination of AZD6244 and BKM120 (middle panel) and levels of p-Akt and p-Erk (bottom panel) in LoVoDM and LoVoCR cells transfected with scrambled or *EDN1* siRNA. (C) *EDN1* and *TGFB2* mRNA levels (top panel), Dose response curves of treatment with the combination of AZD6244 and BKM120 (middle panel) and levels of p-Akt and p-Erk (bottom panel) in LoVoDM and LoVoCR cells transfected with scrambled or *TGFB2* siRNA. All experiments were repeated three times, and data are displayed as mean ± standard deviation. RNA expression was determined by real-time PCR, and normalized to ACTB levels and ratios in parental LoVo cells. Protein phosphorylation levels were measured by ELISA, and normalized to total protein levels. \*and \*\*indicates  $p < 0.05$  compared to LoVoDM and LoVoCR controls respectively.

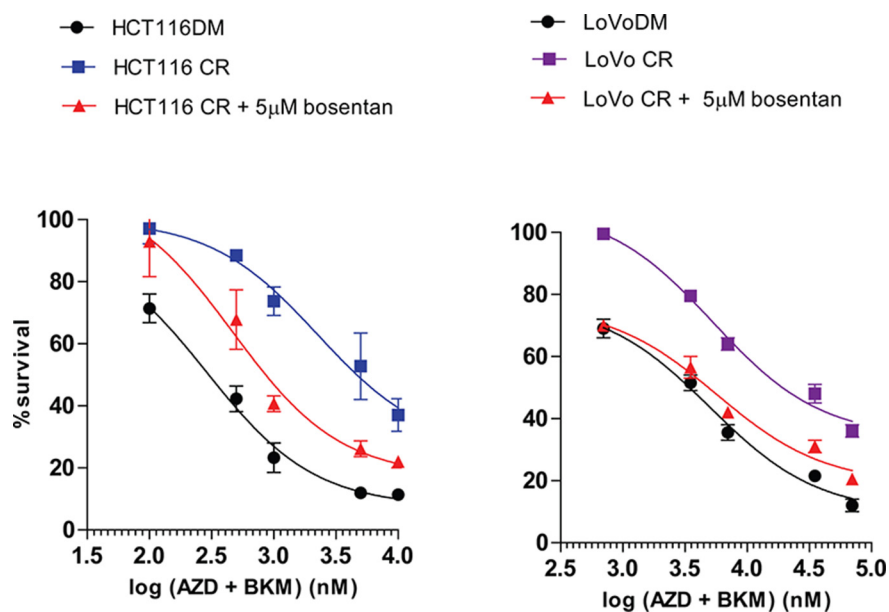

**Supplementary Figure S6: Dose response curves showing effect of low-growth inhibitory concentration of bosentan on combination of AZD6244 and BKM120 in HCT116CR and LoVoCR cells.** Also shown are the dose response curves of AZD6244 and BKM120 combination in HCT116DM and LoVoDM cells as positive controls.

**Supplementary Table S1: IC<sub>50</sub> and combination index values of treatment with various drugs and their combinations in LoVo-derived cells**

| Treatment                              | LoVoDM      | LoVoAR      | LoVoBR      | LoVoCR       |
|----------------------------------------|-------------|-------------|-------------|--------------|
| AZD6244 IC <sub>50</sub> (µM)          | 8.9 ± 1.1   | 31.2 ± 2.5* | 18.4 ± 1.9* | 21.2 ± 2.2*  |
| BKM120 IC <sub>50</sub> (µM)           | 1.2 ± 0.2   | 14.1 ± 1.8* | 6.5 ± 0.8*  | 8.3 ± 1.1*   |
| AZD6244 + BKM120 IC <sub>50</sub> (µM) | 0.9 ± 0.11  | 1.3 ± 0.2   | 1.1 ± 0.1   | 10.2 ± 1.4*  |
| AZD6244 + BKM120 CI <sub>fu0.5</sub>   | 0.35 ± 0.02 | 0.41 ± 0.06 | 0.34 ± 0.02 | 2.72 ± 0.08* |
| GDC0973 IC <sub>50</sub> (µM)          | 6.8 ± 1.24  | 23.1 ± 3.5* | 14.1 ± 2.2* | 9.7 ± 1.9*   |
| BYL719 IC <sub>50</sub> (µM)           | 0.9 ± 0.01  | 8.2 ± 0.8*  | 5.4 ± 0.9*  | 4.7 ± 0.7*   |
| GDC0973 + BYL719 IC <sub>50</sub> (µM) | 0.8 ± 0.02  | 0.9 ± 0.4   | 1.0 ± 0.04  | 6.8 ± 0.6*   |
| GDC0973 + BYL719 CI <sub>fu0.5</sub>   | 0.29 ± 0.01 | 0.25 ± 0.05 | 0.36 ± 0.01 | 3.21 ± 0.12* |

The IC<sub>50</sub> values of AZD6244, BKM120, GDC0973, and BYL719 as single agents and in combination (in the presence of the other drug at fixed ratio of their IC<sub>50</sub> values) are indicated. CI values for fraction unaffected at IC<sub>50</sub> (fu<sub>0.5</sub>) are also given. Additivity = 1, Antagonism > 1, Synergy < 1.

\**p* < 0.05 for differences in IC<sub>50</sub> values compared to LoVoDM, and for differences to 1 for CI values.

**Supplementary Table S2: IC<sub>50</sub> values (μM) of treatment with various agents in respective HCT116-derived cells**

| Compound       | Target     | HCT116DM   | HCT116AR    | HCT116BR    | HCT116CR    |
|----------------|------------|------------|-------------|-------------|-------------|
| 5-Fluorouracil | Cytotoxic  | 8.4 ± 0.4  | 7.1 ± 0.2   | 10 ± 0.3    | 11 ± 1.0    |
| Carboplatin    | Cytotoxic  | 4.7 ± 0.9  | 3.9 ± 0.3   | 5.2 ± 0.4   | 4.6 ± 0.6   |
| Sorafenib      | Pan Kinase | 7.6 ± 0.6  | 13.5 ± 0.9  | 9.6 ± 0.6   | 6.7 ± 0.7   |
| Trametenib     | MEK        | 4.7 ± 0.7  | 56.6 ± 4.9* | 48 ± 4.1*   | 6.0 ± 0.3*  |
| GDC0973        | MEK        | 5.6 ± 0.5  | 20.6 ± 1.3* | 21.1 ± 2.1* | 18.3 ± 1.1* |
| BYL719         | PI3K       | 10 ± 0.2   | 31.2 ± 2.6* | 39.5 ± 3.5* | 25.5 ± 2.1* |
| GDC0941        | PI3K       | > 100      | > 100       | > 100       | > 100       |
| BEZ235         | PI3K/mTOR  | 9.2 ± 0.3  | 67.5 ± 3.8* | 11.2 ± 0.6  | 1.9 ± 0.3*  |
| Ku-0063794     | mTOR       | 8.7 ± 0.4  | 61.9 ± 3.9* | 10 ± 0.4    | 3.9 ± 0.4*  |
| RAD001         | mTOR       | > 100      | > 100       | > 100       | > 100       |
| MK2206         | AKT        | 20.5 ± 0.8 | 16.4 ± 1.1  | 9.4 ± 0.9*  | 1.1 ± 0.2*  |

**Supplementary Table S3: Next generation sequencing output and variants detected in respective cells**

| Sample ID                    | HCT116DM                  | HCT116AR                  | HCT116BR                  | HCT116CR                  |
|------------------------------|---------------------------|---------------------------|---------------------------|---------------------------|
| Number of mapped reads       | 722,034                   | 760,328                   | 780,150                   | 851,690                   |
| Percent base reads on target | 98.31%                    | 98.55%                    | 98.42%                    | 98.33%                    |
| Average base coverage depth  | 3,300                     | 3,480                     | 3,601                     | 3,909                     |
| Uniformity of base coverage  | 98.67%                    | 99.39%                    | 98.18%                    | 96.20%                    |
| Variants, total number       | 25                        | 24                        | 24                        | 26                        |
| Variants, filtered*          | ABL1_Y276C (40.8%)        | ABL1_Y276C (36.7%)        | ABL1_Y276C (43.9%)        | ABL1_Y276C (39.7%)        |
|                              | CTNNB1_Ser45del (42.4%)   | CTNNB1_Ser45del (38.1%)   | CTNNB1_Ser45del (42.2%)   | CTNNB1_Ser45del (41.3%)   |
|                              | KRAS_G13D (52.1%)         | KRAS_G13D (73.8%)         | KRAS_G13D (93.6%)         | KRAS_G13D (95.3%)         |
|                              | PIK3CA_H1047R (49.1%)     | PIK3CA_H1047R (50.5%)     | PIK3CA_H1047R (55.4%)     | PIK3CA_H1047R (51.2%)     |
|                              | SMO_V404M (49.6%)         | SMO_V404M (66.4%)         | SMO_V404M (48.9%)         | SMO_V404M (65.9%)         |
|                              |                           | SMAD4_Y412H (48.3%)       |                           | TP53_T18A (49.8%)         |
|                              |                           |                           |                           | TP53_Y236C (51.7%)        |
|                              |                           |                           |                           |                           |
|                              |                           |                           |                           |                           |
| Sample ID                    | LoVoDM                    | LoVoAR                    | LoVoBR                    | LoVoCR                    |
| Number of mapped reads       | 871,915                   | 762,193                   | 1,021,235                 | 862,241                   |
| Percent base reads on target | 98.02%                    | 98.07%                    | 98.01%                    | 98.12%                    |
| Average base coverage depth  | 3,975                     | 3,487                     | 4,640                     | 3,946                     |
| Uniformity of base coverage  | 98.60%                    | 99.38%                    | 98.74%                    | 99.06%                    |
| Variants, total number       | 20                        | 18                        | 20                        | 19                        |
| Variants, filtered*          | APC_R1114* (35.6%)        | APC_R1114* (49.9%)        | APC_R1114* (39.7%)        | APC_R1114* (49.2%)        |
|                              | APC_M1431CfsTer42 (65.8%) | APC_M1431CfsTer42 (50.8%) | APC_M1431CfsTer42 (59.2%) | APC_M1431CfsTer42 (50.5%) |
|                              | FBXW7_R505C (50.8%)       | FBXW7_R505C (50.9%)       | FBXW7_R505C (49.1%)       | FBXW7_R505C (49.9%)       |
|                              | KRAS_G13D (63.6%)         | KRAS_G13D (63.3%)         | KRAS_G13D (68.4%)         | KRAS_G13D (65.3%)         |
|                              | SMO_A324T (31.9%)         | SMO_A324T (32.2%)         | SMO_A324T (32.8%)         | SMO_A324T (31.9%)         |
|                              | PTEN_A126S (6%)           |                           |                           |                           |
|                              |                           |                           |                           |                           |

\*Number in parenthesis indicates the variant allele frequency from sequencing.
